# Supplementary material
Source: PubMed Central journal article supplement (PMC6430710)
Supplement: NIHMS1519576-supplement-1.pdf [file NIHMS1519576-supplement-1.pdf]

**Supplemental Material to**

**53BP1 as a Potential Predictor of Response in PARP Inhibitor-Treated  
Homologous Recombination-Deficient Ovarian Cancer**

Rachel M. Hurley, Andrea E. Wahner Hendrickson, Daniel W. Visscher, Peter Ansell, Maria I.  
Harrell, Jill M. Wagner, Vivian Negron, Krista M. Goergen, Matthew J. Maurer, Ann L. Oberg, X.  
Wei Meng, Karen S. Flatten, Maja J. A. De Jonge, Carla D. Van Herpen, Jourik A. Gietema,  
Rutger H.T. Koornstra, Agnes Jager, Martha W. den Hollander, Matthew Dudley,  
Stacey P. Shepherd, Elizabeth M. Swisher, Scott H. Kaufmann

**Supplemental Table 1.**

**Genes Assessed for Mutations in BROCA Analysis**

|         |         |        |         |
|---------|---------|--------|---------|
| ATM     | ERCC3   | MLH1   | RAD51D  |
| ATR     | ERCC4   | MRE11A | RBBP8   |
| BABAM1  | ERCC5   | MSH2   | RECQL   |
| BAP1    | ERCC6   | MSH6   | RIF1    |
| BARD1   | EZH2    | NBN    | RINT1   |
| BLM     | FAM175A | NEIL1  | SLX4    |
| BRCA1   | FANCA   | PALB2  | SMARCA4 |
| BRCA2   | FANCB   | PARP1  | TOPBP1  |
| BRCC3   | FANCC   | PAXIP1 | TP53    |
| BRE     | FANCE   | PIK3CA | TP53BP1 |
| BRIP1   | FANCF   | PMS2   | UBE2T   |
| CDH4    | FANCG   | POLD1  | UIMC1   |
| CDK12   | FANCI   | POLE   | USP28   |
| CHD4    | FANCL   | POLQ   | WRN     |
| CHEK1   | FANCM   | PPM1D  | XPA     |
| CHEK2   | GEN1    | PTEN   | XPC     |
| DCLRE1C | HELQ    | RAD50  | XRCC2   |
| DDB1    | ID4     | RAD51  | XRCC3   |
| ERCC1   | LIG4    | RAD51B | XRCC4   |
| ERCC2   | MAD2L2  | RAD51C | XRCC5   |
|         |         |        | XRCC6   |

### Supplemental Table 2

#### Response to Most Recent Platinum Therapy Among Responders and Non-responders

| <b>Time to Progression</b> | <b>Responders</b> | <b>Non-Responders</b> |
|----------------------------|-------------------|-----------------------|
| < 6 months                 | 3                 | 21                    |
| 6 – 12 months              | 3                 | 3                     |
| > 12 months                | 0                 | 0                     |

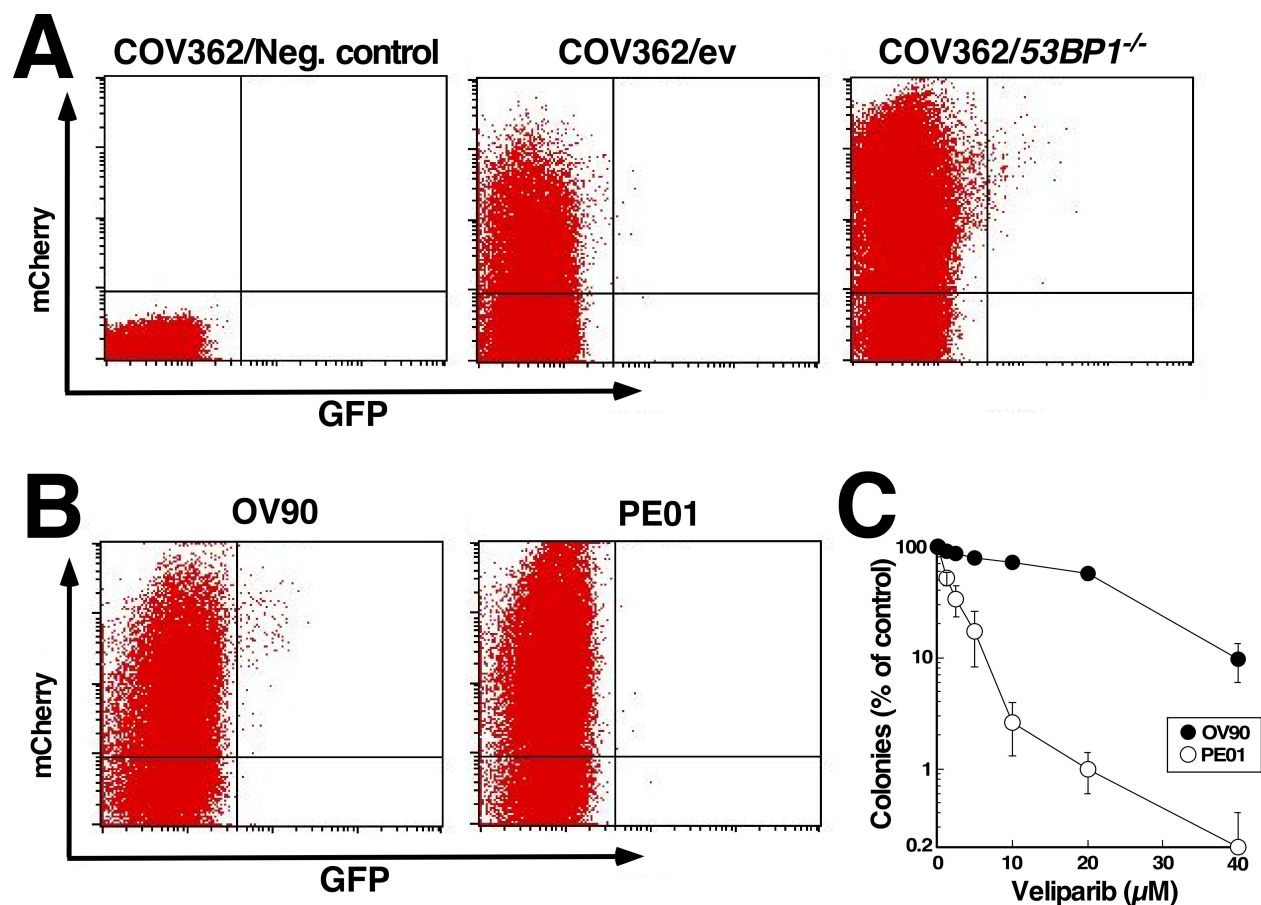

**Supplemental Figure S1. Enhanced reactivation of DR-GFP in BRCA1-deficient COV362 ovarian cancer cells after 53BP1 gene disruption.** **A**, A pool of COV362 cells transduced with pLK.01 puro without (upper middle panel) or with guide RNA targeting 53BP1 (upper right panel) were transfected with DR-GFP (as a substrate for the HR repair machinery) and empty vector (not shown) or plasmid encoding I-SceI and with pCherry (to mark successfully transfected cells with the mCherry protein). Forty-eight hours after transfection, cells were subjected to multiparameter flow cytometry as described in the Methods. Untransfected cells (upper left panel) were used to set gates. **B**, HR-proficient OV90 cells (left panel) and BRCA2-mutant PE01 cells (right panel) served as positive and negative controls, respectively for the HR assay depicted in panel A. Summarized results from multiple assays are shown in Fig. 1. **C**, cell lines used as controls in the HR assays were examined for ability to form colonies in the presence of the indicated veliparib concentrations. Error bars,  $\pm$  SEM from 3 independent assays.

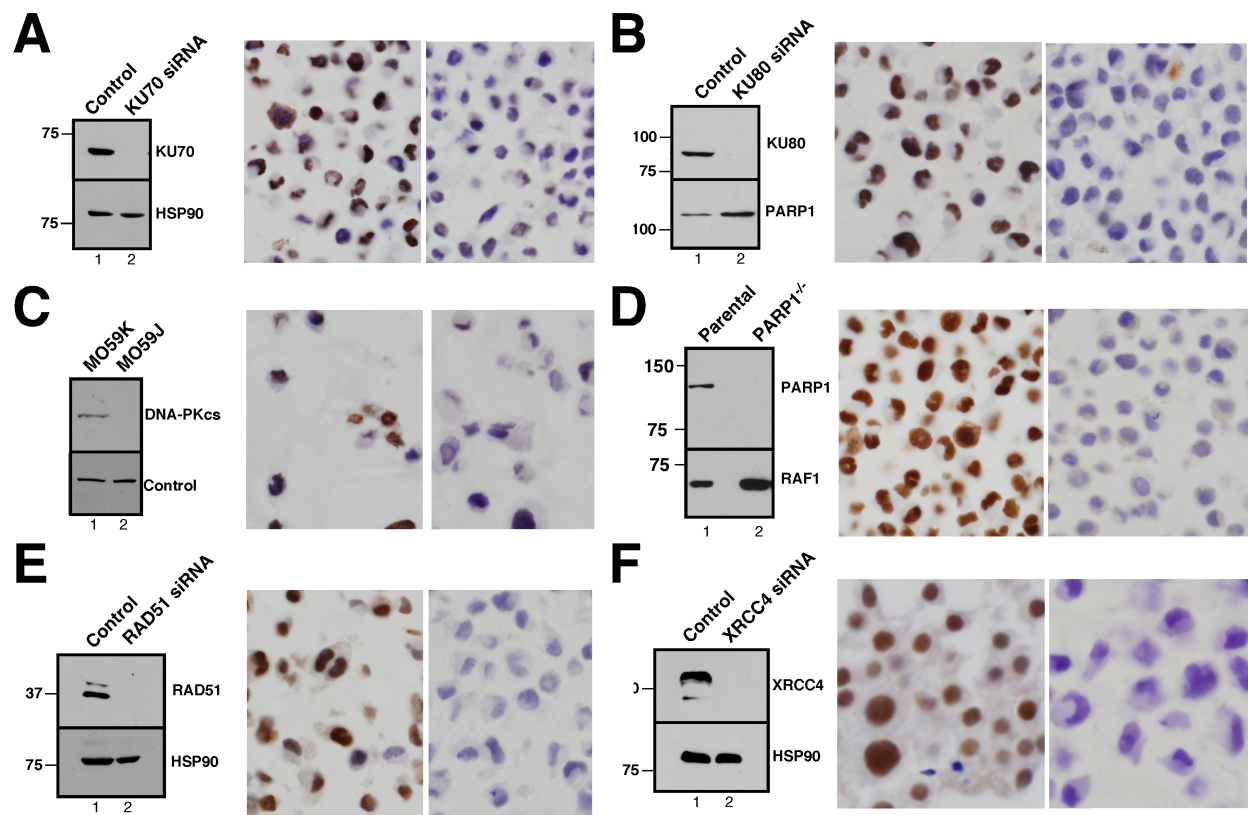

**Supplemental Figure S2. IHC assay validation for KU80, DNA-PK<sub>CS</sub>, KU70, XRCC4, RAD51, and PARP1.** Ovar8 cells transfected with the indicated siRNA (**A**, **B**, **E**, and **F**), parental MO59J cells lacking DNA-PK<sub>CS</sub> and a derivative transfected with the DNA-PK<sub>CS</sub> cDNA (**C**), or parental HCT116 cells and a clone with the *PARP1* gene interrupted (**D**) were subjected to SDS-PAGE and immunoblotting (left panels) or stained for the indicated antigen (right panels) to confirm antibody specificity. In additional experiments, we observed that over half of commercially available antibodies credentialed for detection of these antigens failed this specificity test (data not shown).

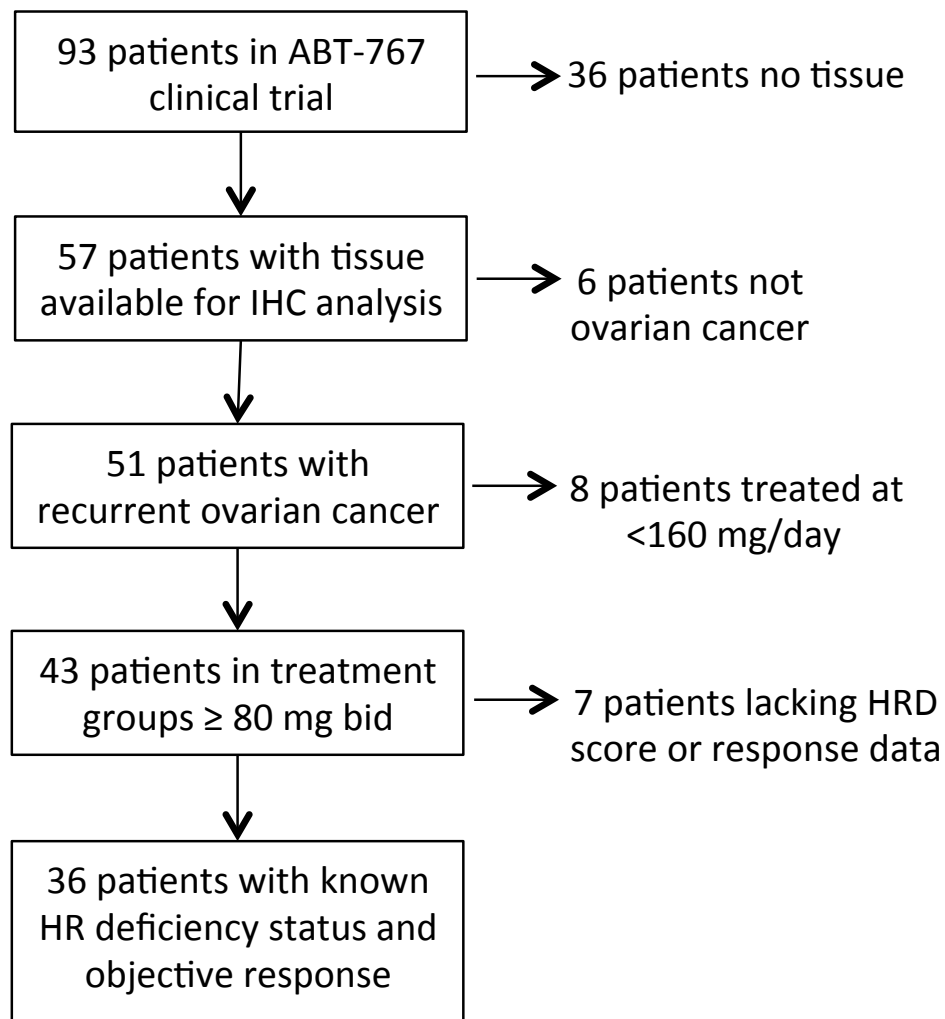

**Supplemental Figure S3. Summary of clinical samples from ABT-767 clinical trial.** In the present study, 36 samples from ovarian cancer patients treated with  $>160$  mg/d ABT-767 who had archival diagnostic specimens, carcinoma HRD scores (Myriad) and response results were analyzed for DNA repair protein expression by IHC as described.

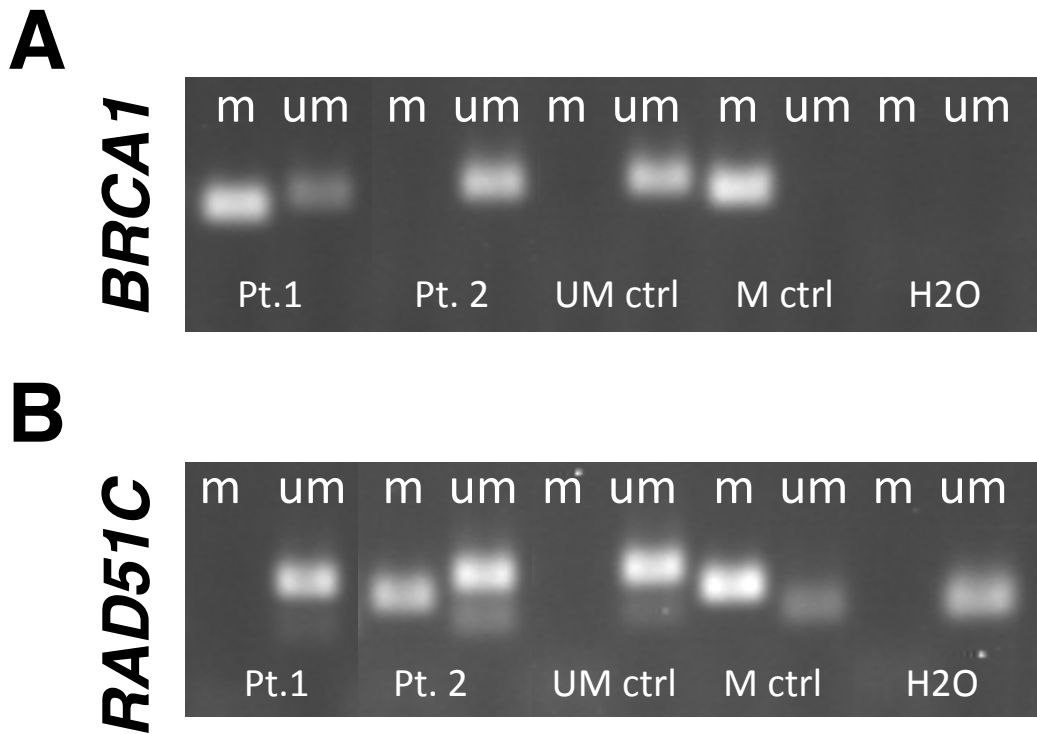

**Supplemental Figure S4. Methylation analysis in HRD carcinomas without *BRCA1* or *BRCA2* mutations.** In carcinomas that i) were deficient in HR as determined by the Myriad HRD assay but did not harbor a deleterious *BRCA1* or *BRCA2* mutation and ii) for which tissue was available for additional analysis, bisulfate sequencing was performed to visualize methylated (m) and unmethylated (um) DNA. The second round of bisulfate sequencing showed *BRCA1* promoter hypermethylation in Patient 1 (**A**) and *RAD51C* promoter hypermethylation in Patient 2 (**B**). Unmethylated controls (UM ctrl) and methylated controls (M ctrl) were utilized in both analyses. Nonadjacent lanes from a single photographic exposure have been juxtaposed to create each panel.

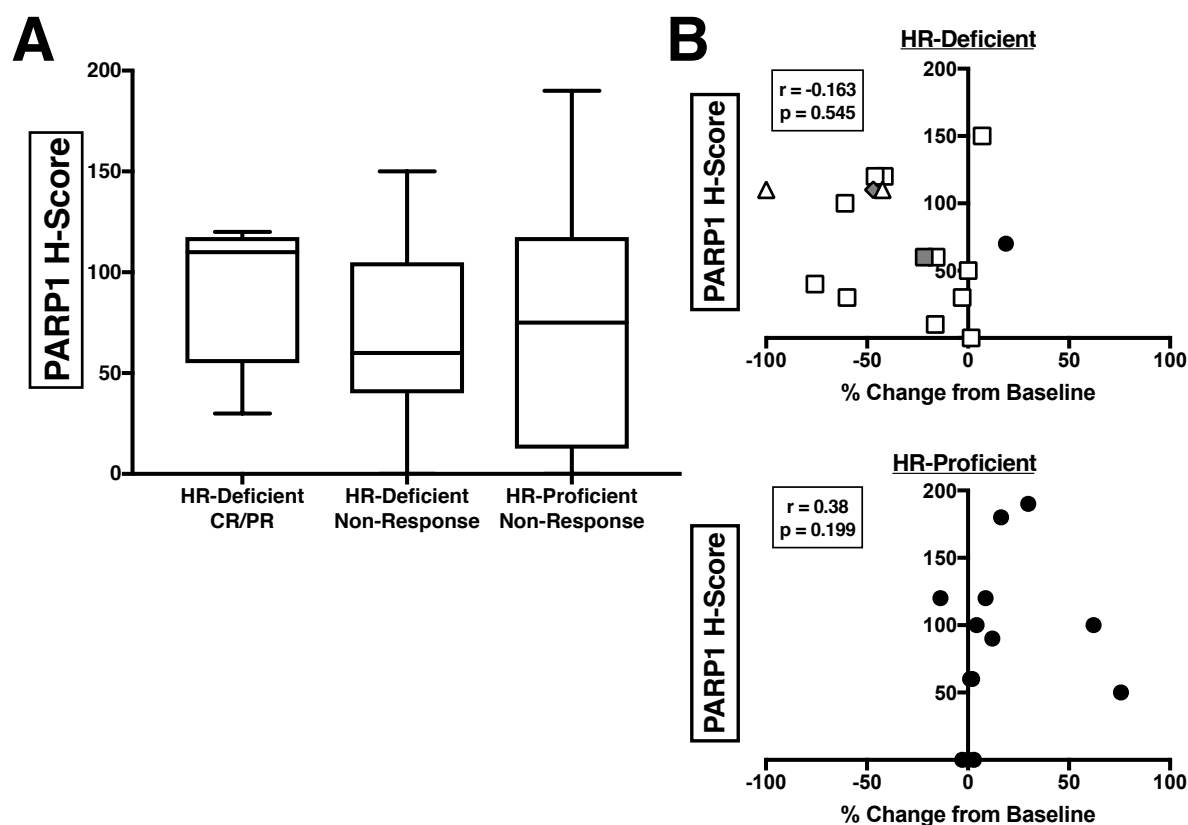

**Supplemental Figure S5. PARP1 expression by IHC does not associate with response.** Modified H-scores for PARP1 protein level did not differ between responders and non-responders by objective response (**A**) or percent change in tumor cross sectional area from baseline (**B**) in HR-deficient or HR-proficient ovarian cancers. HR gene alterations are denoted as mutations (white) or methylation (grey) of *BRCA1* (squares), *BRCA2* (triangle), or *RAD51C* (diamond).

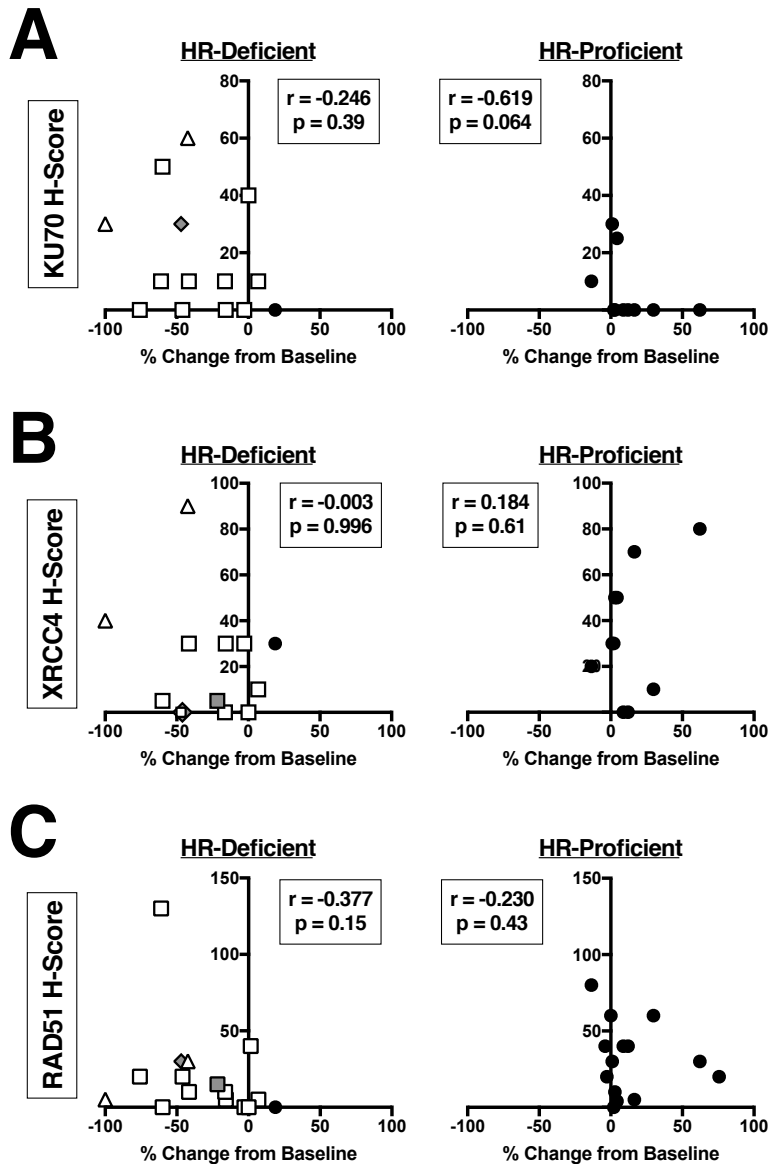

**Supplemental Figure S6. Expression of KU70, XRCC4, or RAD51 does not correlate with change in tumor size.** Modified H-score determined by evaluation of immunohistochemical staining was compared to percent change in tumor cross-sectional area from baseline [19] for KU70 (**A**), XRCC4 (**B**), and RAD51 (**C**). Carcinomas were segregated by HRD score, with HR-deficient shown on the left and HR-proficient shown on the right, and analyzed for Spearman correlation coefficients. HR gene alterations are denoted as mutations (white) or methylation (grey) of *BRCA1* (squares), *BRCA2* (triangle), or *RAD51C* (diamond).
